# Supplementary material
Source: PubMed Central journal article supplement (PMC4267221)
Supplement: NIHMS623322-supplement-Supplementary_information.pdf [file NIHMS623322-supplement-Supplementary_information.pdf]

## Supplementary Methods

### Sample preparation

A portion of pigmented lesions clinically suspicious for melanoma or previously confirmed as melanoma was sampled by punch biopsy at the time of excision. The punch biopsy was bisected; half was sent for permanent section paraffin-embedded histopathological diagnosis, and the other half (along with adjacent normal skin when available) was immediately snap-frozen in liquid nitrogen. The H&E slide was prepared from the snap-frozen tissue embedded in O.C.T. (Sakura Finetek USA, Torrance, CA). Slides were evaluated by a single dermatopathologist [DRF] who identified areas with >70% tumor cellularity, which were then sampled for RNA extraction. Frozen blocks were collected from 42 normal skin samples, 67 primary melanomas, and 20 melanoma metastases. Primary melanomas and melanoma metastases were derived from different patients. Melanoma metastases included lymph nodes (n=15), subcutaneous soft tissue (n=3), spleen (n=1), and small intestine (n=1). Details of 20 paraffin-embedded benign nevi used for immunohistochemical analysis have been previously described (Poynter *et al.*, 2006).

### Isolation of RNA, DNA and microarray hybridization

Total RNA from frozen tissues was extracted using TRIzol protocol (Invitrogen, Carlsbad, CA) and Qiagen RNeasy purification kits (Qiagen, Germantown, MA). DNA was extracted from the TRIzol layer containing DNA with 0.1M sodium citrate precipitation followed by ethanol washing and final elution with 8mM NaOH, 1M HEPES, and 0.5M EDTA. Of the 129 samples in the initial (or “discovery”) set, 76 samples (46 melanomas, 14 melanoma metastases, and 16 normal skin samples) had adequate quantities of high-quality total RNA determined by Agilent 2100 BioAnalyzer (Agilent Technologies, Palo Alto, CA). cDNA was prepared from 50 ng of total RNA using WT-Ovation™ RNA amplification (NuGEN Technologies, Inc., San Carlos, CA) and was hybridized to the Affymetrix Human Genome U133 PLUS 2.0 Array (Affymetrix, Santa Clara, CA) as per manufacturer’s recommendations in the UofM Microarray Core. Arrays were scanned using GeneChip scanner. Expression values were calculated using MAS 5.0 (Affymetrix, Santa Clara, CA).

Melanoma cell lines A375, A2058, CHL-1, and SK-MEL-31 were purchased from ATCC (Manassas, VA). A375, A2058, and CHL-1 were grown in DMEM+10%FBS, and SK-MEL-31 in EMEM+10% FBS. Total RNA was extracted using TRIzol and DNA with Qiagen DNeasy Blood and Tissue kit from 80% confluent cells. RNA was quantified using NanoDrop (Thermo Scientific, Waltham, MA), and its quality was assessed by agarose gel electrophoresis.

### Mutational analysis and quantitative RT-PCR

BRAF exon 15 and NRAS exons 1 and 2 were amplified using PCR primers: BRAF-F\_5'-TTCATGAAGACCTCACAGTAAAAA-3'; BRAF-R 5'-TCCACAAAATGGATCCAGAC-3'; NRAS1-F\_5'-GATGTGGCTCGCCAATTAAC-3'; NRAS1-R\_5'-CCGACAAGTGAGAGACAGGA-3'; NRAS2-F\_5'-CCCCTTACCCTCCACACC-3'; NRAS2-R\_5'-CACAAAGATCATCCTTTTCAGAGAA-3'. PCR conditions: 5 min at 95°C; 40 cycles of 1 min at 95°C, 1 min at 58°C, and 1 min at 72°C; and 10 min at 72°C. Sequencing was performed in the University of Michigan Sequencing Core. Chromatograms were reviewed using Mutation Surveyor 2.61 and Sequencher 4.6. Quantitative real-time RT-PCR was performed on 69 of 74 arrayed samples because the RNA of four normal samples and one melanoma sample was exhausted. Real-time RT-PCR was performed in triplicates with GAPDH as an endogenous control using High Capacity cDNA Reverse Transcription Kit and SYBR Green PCR Master Mix (Applied Biosystems, Foster City, CA) on ABI 7900HT Sequence Detection System. The primers used: HMGA2\_RT3\_F\_5'-TGTGGCCAATGGAACAGTAA-3'; HMGA2\_RT3\_F\_5'-CGACCAACAACAGCAAAGAA-3'. Relative expression of HMGA2 was calculated by  $\Delta C_t$  normalization to the GAPDH expression and compared to the lowest expression level in normal skin samples.

### Immunohistochemistry

Immunohistochemical staining was performed on the DAKO Autostainer (DAKO, Carpinteria, CA) using DAKO LSAB+ and 3,3'-diaminobenzidine as the chromogen. 5 $\mu$ m recuts were deparaffinized, labeled with anti-HMGA2 (goat polyclonal antibody, sc-23684; 1:200; Santa Cruz) and counterstained with

hematoxylin. Antibodies were validated on tissue microarrays containing positive (thyroid carcinoma) and negative (normal thyroid gland) controls. Thyroid carcinoma was shown to express high levels of HMGA2 (Belge *et al.*, 2008). Only nuclear immunoreactivity was scored. Intensity of expression was evaluated by a dermatopathologist [DRF] as follows: negative, weak, moderate, or strong. The percentage of HMGA2-stained tumor nuclei was scored as follows: no staining, <25% cells, 25%-50%, 50%-75%, and 75%-100%. For survival analysis, we dichotomized HMGA2 staining data for positive (any percentage of cells with positive intensity) and negative (no staining).

Replication TMA was stained using the same anti-HMGA2 (goat polyclonal antibody, sc-23684; 1:200; Santa Cruz) antibody as used in the original discovery set. Replication melanoma TMA was scored using tissue microarray and automated quantitative assessment of immunofluorescence (TMA-AQUA).

## Statistical analysis

Quality was assessed using density plot of log-intensity and RNA degradation plot for each sample. For all 76 samples, signal intensities were quantile normalized using robust multiarray analysis (Irizarry *et al.*, 2003) and log<sub>2</sub> transformed. Sample-specific median centering and scaling were applied by standard deviation. Probe sets with no expression and low variability across samples were excluded. Expression values were required to be above the lower quartile of all expression measurements in at least 25% of samples, and the interquartile range across the samples on log<sub>2</sub> scale was required to be at least 0.5. After preprocessing and quality assessment, 74 samples and 44,137 probe sets were subjected to analysis.

Two class comparisons were conducted by two-sample t-tests for all comparisons. Multiple testing was addressed by using p-values controlled for overall false discovery rate (FDR) by the Benjamini and Hochberg method (BH-adjusted p-values). Local FDR was evaluated using locfdr (Efron, 2004). Probes' lists were selected using BH-adjusted p-values and ratio of mean expression values across the two groups.

To identify differentially expressed genes in three comparisons (PCM+MM vs. N; PCM vs. N; MM vs. N), we chose probes with BH-adjusted p-values <0.0001 and >1.8-fold differential expression ratio. The same BH-adjusted p-values <0.0001 but different fold change >1.5 was used for MM vs. PCM comparison because of the lower discriminatory power between these two groups based on expression profiles.

Transcriptome was annotated using NetAffx Analysis Center and classified by comprehensive exploration of data using NCBI (<http://www.ncbi.nlm.nih.gov>), Genecards (<http://www.genecards.org>), and Gene Ontology (<http://amigo.geneontology.org>). Gene set enrichment analysis was performed using DAVID (Dennis *et al.*, 2003) on gene lists with BH-adjusted p-value <0.05 and >1.5-fold change. Data have been deposited in NCBI's Gene Expression Omnibus (GSE15605 <http://www.ncbi.nlm.nih.gov/geo/query/acc.cgi?acc=GSE15605>).

## References

- Belge G, Meyer A, Klemke M, Burchardt K, Stern C, Wosniok W, *et al.* (2008) Upregulation of HMGA2 in thyroid carcinomas: a novel molecular marker to distinguish between benign and malignant follicular neoplasias. *Genes Chromosomes Cancer* 47:56-63.
- Dennis G, Jr., Sherman BT, Hosack DA, Yang J, Gao W, Lane HC, *et al.* (2003) DAVID: Database for Annotation, Visualization, and Integrated Discovery. *Genome biology* 4:P3.
- Efron B (2004) Large-scale simultaneous hypothesis testing: the choice of a null hypothesis. *Jour Amer Stat Assoc* 99:96-104.
- Irizarry RA, Hobbs B, Collin F, Beazer-Barclay YD, Antonellis KJ, Scherf U, *et al.* (2003) Exploration, normalization, and summaries of high density oligonucleotide array probe level data. *Biostatistics (Oxford, England)* 4:249-64.
- Poynter JN, Elder JT, Fullen DR, Nair RP, Soengas MS, Johnson TM, *et al.* (2006) BRAF and NRAS mutations in melanoma and melanocytic nevi. *Melanoma research* 16:267-73.

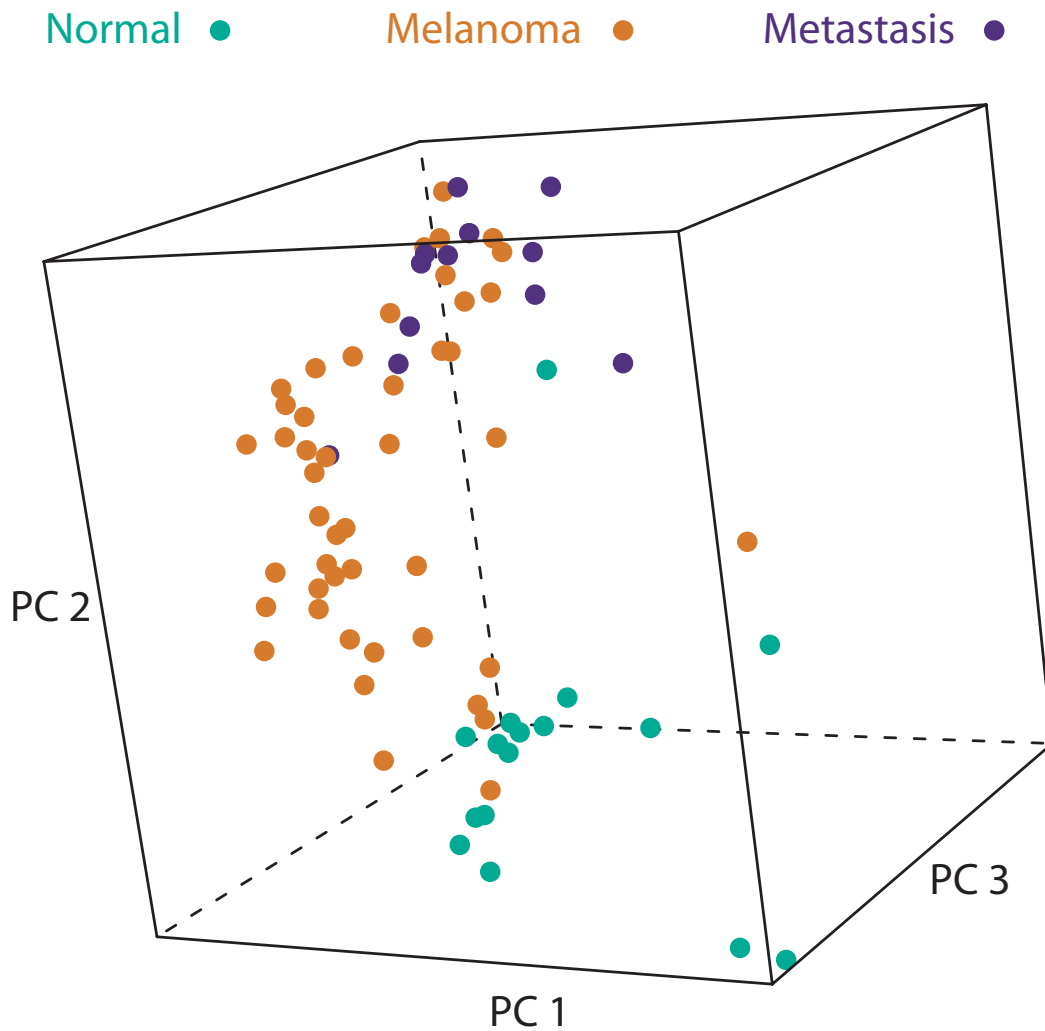

**Supplementary Figure S1:** Three-dimensional plot of the principal components (PC) from the expression data corresponding to 74 samples and 44,137 probes.

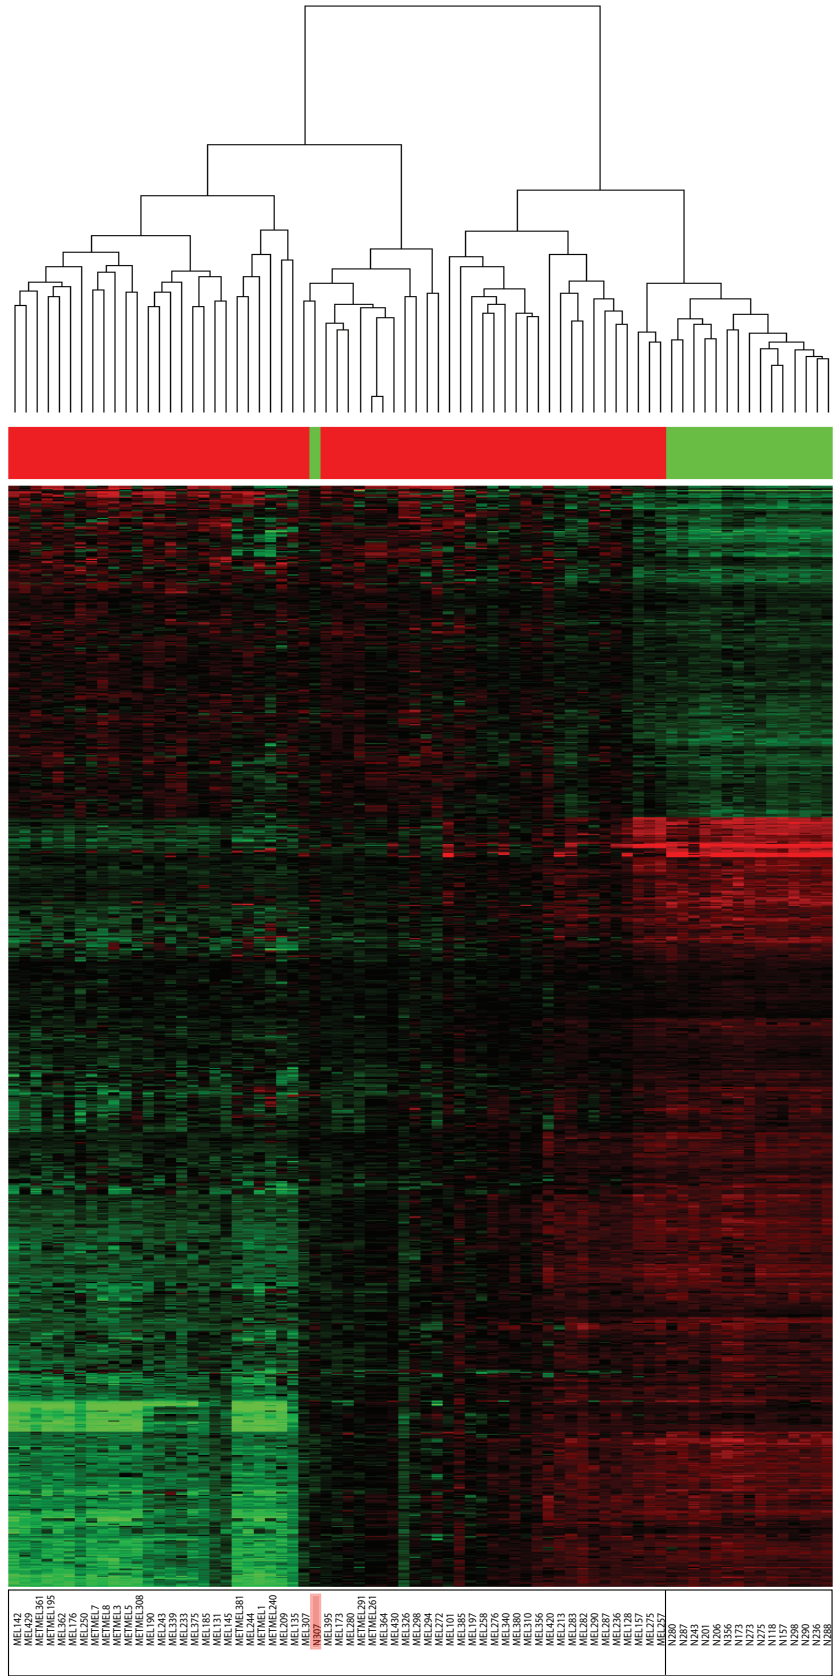

**Supplementary Figure S2:** Unsupervised agglomerative hierarchical clustering of gene expression profiles of the top 1000 differentially expressed genes.

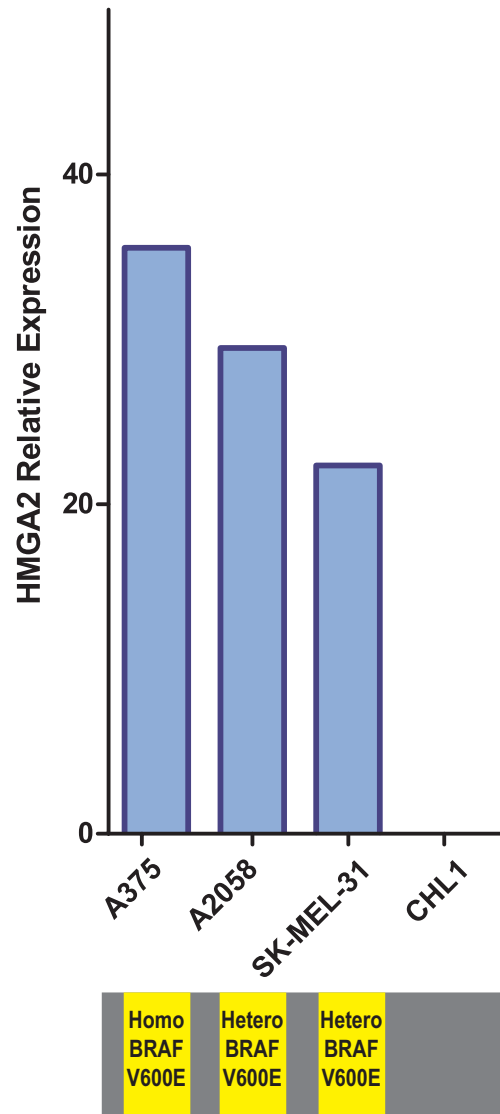

**Supplementary Figure S3:** Quantitative RT-PCR analysis of HMGA2 expression in melanoma cell lines. A375 is homozygous, and A2058 and SK-MEL-31 are heterozygous for *BRAF* V600E mutation. CHL1 does not have mutations in codon 600 in *BRAF*.

**Supplementary Table S1:** Number of probes and genes differentially expressed in each two-class comparison.

| Comparison                  | Number of probe sets |      |         |      |             |      | Number of genes |      |             |      |
|-----------------------------|----------------------|------|---------|------|-------------|------|-----------------|------|-------------|------|
|                             | Unadjusted P<0.05    |      | FC>1.8* |      | BH-p<0.0001 |      | FC>1.8*         |      | BH-p<0.0001 |      |
|                             | Up                   | Down | Up      | Down | Up          | Down | Up              | Down | Up          | Down |
| PCM+MM vs. N<br>(58 vs. 16) | 9205                 | 8213 | 279     | 1002 | 1046        | 1654 | 238             | 800  | 164         | 571  |
| PCM vs. N<br>(46 vs. 16)    | 8354                 | 7629 | 274     | 812  | 784         | 1175 | 216             | 575  | 150         | 411  |
| MM vs. N<br>(12 vs. 16)     | 9686                 | 9096 | 597     | 1744 | 449         | 1620 | 193             | 1126 | 140         | 771  |
| MM vs. PCM<br>(12 vs. 46)   | 5877                 | 6452 | 252     | 690  | 96          | 56   | 43              | 19   | 33          | 17   |

\* Fold change threshold is 1.5 for MetM vs. PCM comparison. Fold change of 1.8 for upregulated probes corresponds to  $1/1.8=0.55556$  for downregulated probes. Fold change of 1.5 for upregulated probes corresponds to  $1/1.5=0.66667$  for downregulated probes.

PCM – primary cutaneous melanoma; MetM – metastatic melanoma; N – normal skin

BH-p – Benjamin and Hochberg adjusted p-value; FC – fold change.

**Supplementary Table S2:** Signal ratio between mutant and WT measured by Sanger sequencing.

| Sample    | BRAF  | NRAS mutant/WT signal ratio | NRAS | NRAS mutant/WT signal ratio |
|-----------|-------|-----------------------------|------|-----------------------------|
| MEL101    | T/T   |                             | WT   |                             |
| MEL128    | T/T   |                             | WT   |                             |
| MEL131    | T/T   |                             | Q61R | 1                           |
| MEL135    | T/T   |                             | WT   |                             |
| MEL142    | V600R | 1                           | WT   |                             |
| MEL145    | T/T   |                             | WT   |                             |
| MEL157    | T/T   |                             | WT   |                             |
| MEL173    | V600E | 1                           | WT   |                             |
| MEL176    | V600E | 1.33                        | WT   |                             |
| MEL185    | T/T   |                             | WT   |                             |
| MEL190    | V600E | 1.17                        | WT   |                             |
| METMEL195 | V600E | 1.86                        | WT   |                             |
| MEL197    | T/T   |                             | Q61R | 0.33                        |
| MEL209    | V600E | 0.88                        | WT   |                             |
| MEL213    | V600E | 1.88                        | WT   |                             |
| MEL233    | T/T   |                             | Q61K | 0.53                        |
| MEL236    | L597S | 1                           | WT   |                             |
| METMEL240 | V600E | 6                           | WT   |                             |
| MEL243    | V600E | 1                           | WT   |                             |
| MEL244    | V600E | 2                           | WT   |                             |
| MEL250    | T/T   |                             | WT   |                             |
| MEL257    | T/T   |                             | WT   |                             |
| MEL258    | T/T   |                             | WT   |                             |
| METMEL261 | T/T   |                             | WT   |                             |
| MEL272    | V600E | 1                           | WT   |                             |
| MEL275    | T/T   |                             | WT   |                             |
| MEL276    | T/T   |                             | WT   |                             |

|               |       |      |      |      |
|---------------|-------|------|------|------|
| MEL280        | V600E | 2    | WT   |      |
| MEL282        | T/T   |      | WT   |      |
| MEL283        | T/T   |      | WT   |      |
| MEL287        | T/T   |      | WT   |      |
| MEL290        | V600E | 0.8  | WT   |      |
| METMEL291     | T/T   |      | Q61K | 0.77 |
| MEL294        | T/T   |      | WT   |      |
| MEL298        | V600K | 0.7  | WT   |      |
| MEL307        | V600K | 0.7  | WT   |      |
| METMEL308     | V600E | 0.8  | WT   |      |
| MEL310        | T/T   |      | Q61R | 1    |
| MEL326        | V600E | 1    | WT   |      |
| MEL339        | V600E | 0.8  | WT   |      |
| MEL340        | T/T   |      | WT   |      |
| MEL356        | V600E | 6    | WT   |      |
| METMEL361     | T/T   |      | WT   |      |
| MEL362        | V600E | 1.43 | WT   |      |
| MEL364        | T/T   |      | WT   |      |
| MEL375        | T/T   |      | Q61L | 0.5  |
| MEL380        | V600E | 0.8  | WT   |      |
| METMEL381     | V600E | 3    | WT   |      |
| MEL385        | T/T   |      | WT   |      |
| MEL395        | T/T   |      | WT   |      |
| MEL420        | T/T   |      | WT   |      |
| MEL429        | T/T   |      | Q61L | 2    |
| MEL430        | L597R | 0.7  | WT   |      |
| METMEL2007-01 | T/T   |      | Q61L | 2.3  |
| METMEL2007-03 | V600E | 6    | WT   |      |
| METMEL2007-05 | V600E | 0.7  | WT   |      |
| METMEL2007-07 | V600E | 6    | WT   |      |
| METMEL2007-08 | V600K | 2    | WT   |      |

|                             |  |      |  |      |
|-----------------------------|--|------|--|------|
| Mean mutant/WT signal ratio |  | 1.91 |  | 1.05 |
|-----------------------------|--|------|--|------|
